# Supplementary material for: Prevalence of Irritable Bowel Syndrome and associated factors among medical students at the University of Gondar, Northwest Ethiopia, 2023
Source: Research Square preprint supplement (doi:10.21203/rs.3.rs-4423523/v1), 2024-05-29
Supplement: Supplementary file 1 [file eb2cec0e4cd799c21e35bd6a.docx]

# Annexes

## Annex I: Consent and questionnaire

Hello my name -----I am a 5th year medical student at the University of Gondar. I am conducting a research on prevalence and associated factors of Irritable bowel syndrome among medical students in university of Gondar, North West Ethiopia, 2023.

You need to know the study does not cause any harm rather it will assess prevalence of Irritable bowel syndrome and its associated factors. Therefore, I am going to ask you few questions concerning Irritable bowel syndrome.

I have received permission from Gondar Referral Hospital to conduct this research. I would like to appreciate your participation in this interview. Whatever information from participants will be strictly confidential. Please give your answer; as truthfully as possible. It requires only few minutes.

Would you participate in responding to the questions in this questionnaire?

Yes --------No------

If yes please proceed to the questions, if no please return the paper to the data collector.

Name and Signature of the data collector ______________

Name and signature of the supervisor ____________________

Date of interview_________

**Part one: Socio demographics**

| **code** | **Question** | **Response (circle the appropriate answer)** |
| --- | --- | --- |
| **1.** | Age | **________** |
| **2.** | Gender | 1. female  **2.** male |
| **3.** | Year of study | **1.** 4th year medical student  **2.** 5th year medical student |
| 3. | GPA | **________** |
| **4.** | Marital status | 1. Single  2. Married |
| **5.** | Residence | 1. Rural  2. Urban |
| **6.** | Family size: | 1. 1 person  2. 2 people  3. 3-5 people  4. 6 people or more |

**Part two -IBS Symptoms Rome IV**

| 1. | Do you have recurrent abdominal pain in the past 3 months? | 1. Yes  2. No |
| --- | --- | --- |
|  | If your answer is yes to the above question proceed to the next questions (question number 2-5) if not skip to question number -6. | |
| 2. | How many days in a week do you have abdominal pain? | 1. One  2. Two  3. Three  4. Four  5. Five and above |
| 3. | What associated Symptoms do you have (more than one answer is possible)? | 1.Releated to defecation  2 change in frequency of stool  3 change in stool form  A. Constipation (hard stool)  B. Diarrhea (soft stool)  C. Both |
| 4. | How does it affect your daily life?  (more than one answer is possible) | 1.Missed lecture  2.Skip meal  3.Reduced study hours  4.Sleep disturbance  5.other _______ |
| 5. | What do you do to relieve your symptoms? | 1.Self medication  2.prescribed medication  3.No use of medication  4.Skip meal  5.dietary modification |
| 6. | Do you have unexpected weight loss(4.5 kg) in the past 3 months? | 1. Yes  2. No |
| 7. | Do you have family history of gastrointestinal disease? | 1. Yes  2. No |
| 8. | Do you have evidence of GI blood loss? | 1. Yes  2. No |
| 9. | If yes to question number 8,which evidence do you have ? | 1. Bloody vomiting  2. Black stool  3. Blood in the stool |

**Part three -Risk Factors**

For the next 14 questions mark your answers in the box.

|  | Symptom | 0( no) | 1(mild) | 2(moderate) | 3(severe) |
| --- | --- | --- | --- | --- | --- |
| 1. | I feel tense or wound up |  |  |  |  |
| 2. | I get a sort of frightened feeling as if something awful is about to happen |  |  |  |  |
| 3. | Worrying thoughts go through my mind |  |  |  |  |
| 4. | I can sit at ease and feel relaxed |  |  |  |  |
| 5. | I get a sort of frightened feeling like 'butterflies' in the stomach |  |  |  |  |
| 6. | I feel restless as I have to be on the move |  |  |  |  |
| 7. | I get sudden feelings of panic |  |  |  |  |
| 8. | I still enjoy the things I used to enjoy |  |  |  |  |
| 9. | I can laugh and see the funny side of things |  |  |  |  |
| 10. | I feel cheerful |  |  |  |  |
| 11. | I feel as if I am slowed down |  |  |  |  |
| 12. | I have lost interest in my appearance |  |  |  |  |
| 13. | I look forward with enjoyment to things |  |  |  |  |
| 14. | I can enjoy a good book or radio or TV program |  |  |  |  |

| 15. | Do you have a history of GI pre infection like bacterial, viral , or protozoal ? | 1. Yes  2. No |
| --- | --- | --- |
| 16. | Number of daily meal | 1. 0-2  2. 3-4  3. More than 4 |
| 17. | Do you have food intolerance? | 1.Yes  2. No |
| 18. | Do you have daily caffeine consumption? | 1. Yes  2. No |
| 19. | Do you have emotional stress in previous 6 months? | 1. Yes  2.. No |
| 20. | Do you have family history of IBS? | 1. Yes  2. No |
| 21. | If Yes, How many member of your family is affected | _______ |
| 22. | Do you have history of chronic medical illness? | 1. Yes  2. No |
| 23. | Do you have any medication use? | 1. Yes  2. No |
| 24. | Do you have history of smoking ? | 1. Currently smoker  2. Previously smoker  3. Never smoked |

##

## Annexes Ⅱ: Declaration

Ethics approval and consent to participate

This research got ethics approval from the University of Gondar. Every participant of the research was consented to fill in the questionnaire.

Consent for publication

Not applicable

Availability of data and material

All data generated or analyzed during this study are included in this published article

Competing interests

The authors have declared that no competing interests exist.

Funding

No funding

Authors’ contributions

SB, MM, MZ, MS, MM, ME, and MM collected data, and wrote and revised the manuscript.
All authors read and approved the final manuscript

Acknowledgement

First of all, we would like to thank the University of Gondar, College of Medicine and Health Science, school of medicine that allows us to do this research. Next to this, we also would like to express our heartfelt gratitude to our advisors Dr. Zelalem Ayichew and Dr. Alazar Wogayehu, for their unreserved constructive advice, support, guidance, continuous comments and suggestions throughout the research process and also Dr.Segenet Bizuneh for his willingness and promise to give medical support for those who had positive symptoms in our study.
